# Supplementary material for: Multiple Functional Risk Variants in a SMAD7 Enhancer Implicate a Colorectal Cancer Risk Haplotype
Source: PubMed Central journal article supplement (PMC4223076; doi:10.1371/journal.pone.0111914), 2014-11-06
Supplement: pone.0111914.s006.pdf [file pone.0111914.s006.pdf]

## Supplemental Materials and Methods

### Constructs used in study

| Name | Genomic Coordinates of Insert | Primers                                                                              | SNPs within Construct Insert                   |
|------|-------------------------------|--------------------------------------------------------------------------------------|------------------------------------------------|
| A    | chr18:46448427-46450512       | TAGGTACCGAGCTCCGCCAGGCTCTTACAGCCCTTTG,<br>TCTCAGCTGCTCGAGCCGATGCCAATGTGTCTTCCT       | rs6507874, rs6507875,<br>rs8085824, rs58920878 |
| A1   | chr18:46448646-46449078       | TAGGTACCGAGCTCCGCTTTCAACTGGATGGAACCTTG,<br>TCTCAGCTGCTCGAGCCAATCTTCTGTCTGGGCTGGA     | rs6507874, rs6507875                           |
| A2   | chr18:46449057-46449506       | TAGGTACCGAGCTCCGCCAGACAGAAGATTATGTGTCTCA<br>A, TCTCAGCTGCTCGAGCCTACAAGACTTCCGGTCTCCA | rs8085824                                      |
| A3   | chr18:46449051-46449664       | TAGGTACCGAGCTCCGCTCCAGCCCAGACAGAAGATT,<br>TCTCAGCTGCTCGAGCCAAGGCCACACAAAACACAT       | rs8085824, rs58920878                          |
| A4   | chr18:46449427-46449942       | TAGGTACCGAGCTCCGCCAGACTGCAGGAACGCTGT,<br>TCTCAGCTGCTCGAGCCGAGTGTGCACATTTGTATGG       | rs58920878                                     |
| B    | chr18:46450925-46451320       | TAGGTACCGAGCTCCGCAGCCCAGAAAACTGCAATG,<br>TCTCAGCTGCTCGAGCCGGGAATTCAGGGCAAAGG         | rs12956924,<br>rs34007497                      |
| C    | chr18:46451457-46452057       | TAGGTACCGAGCTCCGCCCTCTGAAGGCAAACTCACA,<br>TCTCAGCTGCTCGAGCCCACCCTGTGCCATTGAGAC       | rs4939567                                      |
| D    | chr18:46453028-46453391       | TAGGTACCGAGCTCCGCCTTGCACCTGGCAACCTG,<br>TCTCAGCTGCTCGAGCCTCTATTTGGGGAGGGATTC         | rs11874392                                     |
| E    | chr18:46453066-46453854       | TAGGTACCGAGCTCCGCAGGGTCTCCCTCCTCAG,<br>TCTCAGCTGCTCGAGCCCATGGCTAGAATGCGCTAA          | rs11874392,<br>rs4939827, rs35352860           |
| F    | chr18:46453693-46454148       | TAGGTACCGAGCTCCGCCTTTGCAGCATCTCCAGTGA,<br>TCTCAGCTGCTCGAGCCGGGATGTGGAGACAATCAGG      | rs35352860,<br>rs12953717, rs7226855           |
| G    | chr18:46458022-46459036       | TAGGTACCGAGCTCCGCATCACCGAAGGGACTTGG,<br>TCTCAGCTGCTCGAGCCTCACATTCATCTTCTGTCTG        | rs9946510, rs6507877,<br>rs4464148             |

### Oligonucleotides used in this study

| Name                  | Label | Sequence                                             |
|-----------------------|-------|------------------------------------------------------|
| rs6507874 C allele    |       | CCA GGT GTC TAG ACT CCG GGA CCA CCT ATG GGA          |
| rs6507874 T allele    |       | CCA GGT GTC TAG ACT CTG GGA CCA CCT ATG GGA          |
| rs6507875 C allele    |       | TCC GGG ACC ACC TAT GCG ATG GTC TCT GGG TGC          |
| rs6507875 G allele    |       | TCC GGG ACC ACC TAT GGG ATG GTC TCT GGG TGC          |
| rs8085824 C allele    |       | CCC CCT TCT CCC CTT CCC TGC CGG CAC CCC CAT          |
| rs8085824 T allele    |       | CCC CCT TCT CCC CTT CTC TGC CGG CAC CCC CAT          |
| rs58920878 C allele   |       | GTC AGG GCC TTG CCC TCG CTC CCT GCA GCC CCA          |
| rs58920878 G allele   |       | GTC AGG GCC TTG CCC TGG CTC CCT GCA GCC CCA          |
| rs6507874 C allele F  | 700   | /5IRD700/CCA GGT GTC TAG ACT CCG GGA CCA CCT ATG GGA |
| rs6507874 C allele R  | 700   | /5IRD700/TCC CAT AGG TGG TCC CGG AGT CTA GAC ACC TGG |
| rs6507874 T allele F  | 800   | /5IRD800/CCA GGT GTC TAG ACT CTG GGA CCA CCT ATG GGA |
| rs6507874 T allele R  | 800   | /5IRD800/TCC CAT AGG TGG TCC CAG AGT CTA GAC ACC TGG |
| rs6507875 C allele F  | 700   | /5IRD700/TCC GGG ACC ACC TAT GCG ATG GTC TCT GGG TGC |
| rs6507875 C allele R  | 700   | /5IRD700/GCA CCC AGA GAC CAT CGC ATA GGT GGT CCC GGA |
| rs6507875 G allele F  | 800   | /5IRD800/TCC GGG ACC ACC TAT GGG ATG GTC TCT GGG TGC |
| rs6507875 G allele R  | 800   | /5IRD800/GCA CCC AGA GAC CAT CCC ATA GGT GGT CCC GGA |
| rs8085824 C allele F  | 700   | /5IRD700/CCC CCT TCT CCC CTT CCC TGC CGG CAC CCC CAT |
| rs8085824 C allele R  | 700   | /5IRD700/ATG GGG GTG CCG GCA GGG AAG GGG AGA AGG GGG |
| rs8085824 T allele R  | 800   | /5IRD800/ATG GGG GTG CCG GCA GAG AAG GGG AGA AGG GGG |
| rs8085824 T allele F  | 800   | /5IRD800/CCC CCT TCT CCC CTT CTC TGC CGG CAC CCC CAT |
| rs58920878 C allele F | 700   | /5IRD700/GTC AGG GCC TTG CCC TCG CTC CCT GCA GCC CCA |
| rs58920878 C allele R | 700   | /5IRD700/TGG GGC TGC AGG GAG CGA GGG CAA GGC CCT GAC |
| rs58920878 G allele R | 800   | /5IRD800/TGG GGC TGC AGG GAG CCA GGG CAA GGC CCT GAC |
| rs58920878 G allele F | 800   | /5IRD800/GTC AGG GCC TTG CCC TGG CTC CCT GCA GCC CCA |
| Competitor X          |       | GAG CCA CCG AGC CTG CAC CAC CAA GGG                  |

| Transcription Factor | Position | Motif sequence with rs6507874<br>and/or rs6507875 denoted | CG haplotype motif scores |        | Change with TC alleles |          |
|----------------------|----------|-----------------------------------------------------------|---------------------------|--------|------------------------|----------|
|                      |          |                                                           | Core                      | Matrix | Δ Core                 | Δ Matrix |
| MECP2                | 14 (-)   | tagacTC(C/T)GG                                            | 1.000                     | 0.925  | 0.245                  | 0.199    |
| RBP-Jkappa           | 29 (+)   | cctaTG(G/C)GAtg                                           | 1.000                     | 0.704  | 0.102                  | 0.070    |
| RBP-Jkappa           | 17 (+)   | actc(C/T)GGGAcc                                           | 0.745                     | 0.545  | -0.255                 | -0.174   |
| Churchill            | 21 (+)   | (C/T)GGGAcc                                               | 0.998                     | 0.991  | 0.014                  | 0.014    |
| YY1-like             | 29 (-)   | ccTATG(G/C)                                               | 0.996                     | 0.938  | 0.200                  | 0.189    |
| CTCF                 | 21 (-)   | (c/t)gggaCCACctatg(g/c)gatgg                              | 0.959                     | 0.822  | 0.000                  | 0.136    |
| muscle               | 28 (-)   | acctatg(G/C)GATGgtctctggg                                 | 0.932                     | 0.836  | 0.052                  | 0.036    |
| AIRE                 | 14 (-)   | tagactc(c/t)gggacCACCTatg(g/c)gatg                        | 0.925                     | 0.862  | 0.000                  | 0.180    |
| hlf                  | 28 (-)   | acCTATG(g/c)ga                                            | 0.921                     | 0.925  | 0.000                  | 0.095    |
| muscle               | 18 (+)   | ctc(c/t)gggacCACCTatg(g/c)gat                             | 0.912                     | 0.839  | 0.000                  | 0.017    |
| KLF4                 | 33 (-)   | tg(G/C)GATG                                               | 0.906                     | 0.910  | 0.246                  | 0.234    |
| Ikaros               | 19 (+)   | tc(c/t)GGGACca                                            | 0.903                     | 0.802  | 0.000                  | -0.064   |
| Tef-1-related        | 32 (+)   | atG(G/C)GATgg                                             | 0.900                     | 0.824  | 0.128                  | 0.102    |
| Pax                  | 20 (+)   | C(C/T)GGGaccacc                                           | 0.735                     | 0.670  | -0.165                 | -0.088   |
| Ikaros               | 31 (+)   | tatG(G/C)GATgg                                            | 0.897                     | 0.887  | 0.269                  | 0.226    |
| NF-1A                | 20 (+)   | C(C/T)GGGga                                               | 0.714                     | 0.716  | -0.170                 | -0.168   |
| NF-1A                | 32 (+)   | ATG(G/C)Ga                                                | 0.873                     | 0.874  | 0.307                  | 0.305    |
| BEN                  | 15 (-)   | agaCTC(C/T)G                                              | 0.717                     | 0.652  | -0.123                 | -0.113   |
| SREBP                | 30 (-)   | ctatg(g/c)GATGgtctc                                       | 0.830                     | 0.838  | 0.000                  | 0.045    |
| DBP                  | 35 (-)   | (g/c)gATGGT                                               | 0.788                     | 0.765  | 0.000                  | 0.041    |
| RFX-related          | 7 (-)    | agGTGTctagactc(c/t)gg                                     | 0.786                     | 0.740  | 0.000                  | 0.040    |
| Sp100                | 27 (-)   | cacctatg(G/C)GATgg                                        | 0.477                     | 0.499  | -0.269                 | -0.225   |
| GR-like              | 21 (-)   | (c/t)GGGACccacctatg(g/c)g                                 | 0.741                     | 0.606  | 0.000                  | -0.044   |
| BEN                  | 20 (+)   | C(C/T)GGGacc                                              | 0.725                     | 0.750  | -0.012                 | -0.011   |
| Zic                  | 13 (-)   | ctagaCTC(C/T)Gggacc                                       | 0.524                     | 0.492  | -0.196                 | -0.128   |
| AP-2                 | 25 (+)   | acCACCTatg(g/c)gatg                                       | 0.719                     | 0.643  | 0.000                  | 0.136    |
| HOMEZ                | 27 (-)   | cacctatG(G/C)GATggctct                                    | 0.471                     | 0.577  | -0.241                 | -0.166   |
| CDP                  | 27 (+)   | cACCTAtg(g/c)g                                            | 0.711                     | 0.772  | 0.000                  | 0.055    |
| HOMEZ                | 28 (+)   | acctatG(G/C)GATggctctc                                    | 0.451                     | 0.383  | -0.227                 | -0.157   |
| Rhox11               | 10 (-)   | tgtctagACTC(C/T)gggac                                     | 0.669                     | 0.592  | 0.185                  | 0.143    |
| HDX                  | 30 (-)   | ctatg(G/C)GATGgtctctg                                     | 0.666                     | 0.612  | 0.007                  | 0.005    |
| Rhox11               | 31 (+)   | tatg(g/c)GATGGtctctgg                                     | 0.661                     | 0.583  | 0.000                  | -0.019   |
| HD-SINE              | 30 (-)   | ctatg(G/C)GATGgtctctg                                     | 0.656                     | 0.553  | -0.004                 | -0.003   |
| HDX                  | 10 (-)   | tgtctAGACTc(c/t)gggac                                     | 0.614                     | 0.586  | 0.000                  | 0.061    |
| AP-2                 | 25 (-)   | accacctaTG(G/C)GAtg                                       | 0.574                     | 0.643  | 0.281                  | 0.136    |
| Rhox11               | 14 (+)   | tagacTC(C/T)GGgaccacc                                     | 0.324                     | 0.370  | -0.243                 | -0.188   |
| HD-SINE              | 16 (-)   | gactc(C/T)GGGAccaccta                                     | 0.408                     | 0.494  | -0.149                 | -0.109   |
| Hox9-12              | 26 (-)   | ccaccTATG(G/C)gatggtc                                     | 0.398                     | 0.527  | -0.152                 | -0.095   |
| Hox-13               | 27 (-)   | caccTATG(G/C)gatggtc                                      | 0.458                     | 0.540  | -0.079                 | -0.048   |
| Cphx                 | 20 (+)   | c(c/t)gggacCACCTat                                        | 0.510                     | 0.396  | 0.000                  | -0.129   |

**Table S1. Differential Transcription Factor Binding Candidates for rs6507874 and rs6507875.** Biobase Match search using Matrix library: TRANSFAC MATRIX TABLE, Release 2013.4, and Profile: vertebrate\_non\_redundant.prf, minimize false negatives. Candidate TF list was determined using the CG haplotype +/- 20 bp from each SNP inclusive of the 13 bp between the two SNPs. Predicted TFs with a change in core and matrix scores < 0.010 upon search using the TC haplotype were eliminated. Differences in core and matrix scores with the TC haplotype are listed in the right two columns. Proteins predicted to preferentially bind the CG haplotype are highlighted in red; proteins predicted to preferentially bind the TC haplotype are highlighted in green. Darker shades indicate greater differences in core and matrix scores. SNP position is underlined in binding sequence with rs6507874 in red and rs6507875 in blue. Position and orientation of motif start site relative to the beginning of the 55 mer search sequence are listed in column 2.

| Transcription Factor    | Position | Motif sequence with<br>rs8085824 denoted | T allele motif scores |        | Change with C allele |                 |
|-------------------------|----------|------------------------------------------|-----------------------|--------|----------------------|-----------------|
|                         |          |                                          | Core                  | Matrix | $\Delta$ Core        | $\Delta$ Matrix |
| RUSH-1alpha             | 14 (+)   | cccCTTC(T/C)ct                           | 0.989                 | 0.986  | 0.124                | 0.111           |
| Blimp-1                 | 15 (-)   | cccTTC(T/C)Ctgccgg                       | 0.949                 | 0.826  | -0.037               | -0.022          |
| Sp100                   | 18 (-)   | ttc(t/c)ctgcccGGCACC                     | 0.862                 | 0.765  | 0.000                | 0.038           |
| Ikaros                  | 20 (-)   | c(t/c)CTGCCggc                           | 0.832                 | 0.760  | 0.000                | -0.024          |
| YY1                     | 16 (+)   | CCTTC(t/c)c                              | 0.813                 | 0.806  | 0.000                | 0.035           |
| Zic1                    | 18 (-)   | ttc(t/c)cTGCCGgcacc                      | 0.804                 | 0.596  | 0.000                | -0.150          |
| Kaiso                   | 19 (+)   | tc(T/C)CTGCcgg                           | 0.800                 | 0.638  | -0.200               | -0.155          |
| Ets                     | 16 (+)   | cCTTC(T/C)ct                             | 0.783                 | 0.730  | -0.217               | -0.200          |
| Pax                     | 18 (-)   | ttc(t/c)ctGCCGG                          | 0.718                 | 0.598  | 0.000                | 0.022           |
| GKLF                    | 17 (+)   | CTTC(T/C)ct                              | 0.709                 | 0.725  | -0.233               | -0.220          |
| Churchill               | 18 (-)   | tTC(T/C)CT                               | 0.656                 | 0.657  | -0.327               | -0.323          |
| Helios A                | 1 (-)    | cccTTC(T/C)Ctgc                          | 0.633                 | 0.489  | -0.309               | -0.232          |
| Ikaros                  | 16 (-)   | ccTTC(T/C)Ctgc                           | 0.628                 | 0.613  | -0.269               | -0.226          |
| LXR, PXR, CAR, COUP, RA | 18 (+)   | ttc(t/c)ctgcccGCACCcc                    | 0.627                 | 0.636  | 0.000                | -0.059          |
| Zic1                    | 13 (-)   | tccccTTC(T/C)Ctgccg                      | 0.559                 | 0.705  | 0.195                | 0.128           |

**Table S2. Differential Transcription Factor Binding Candidates for rs8085824.** Biobase Match search using Matrix library: TRANSFAC MATRIX TABLE, Release 2013.4, and Profile: vertebrate\_non\_redundant.pr, minimize false negatives. Candidate TF list was determined using the T allele +/- 20 bp. Predicted TFs with a change in core and matrix scores < 0.010 upon search using the C allele were eliminated. Differences in core and matrix scores with the C allele are listed in the right two columns. Proteins predicted to preferentially bind the T allele are highlighted in red; proteins predicted to preferentially bind the C allele are highlighted in green. Darker shades indicate greater differences in core and matrix scores. SNP position is underlined in binding sequence. Position and orientation of motif start site relative to the beginning of the 41mer search sequence are listed in column 2.

| Transcription Factor    | Position | Motif sequence with rs58920878 denoted | C allele motif scores |        | Change with G allele |          |
|-------------------------|----------|----------------------------------------|-----------------------|--------|----------------------|----------|
|                         |          |                                        | Core                  | Matrix | Δ Core               | Δ Matrix |
| MAZ                     | 21 (-)   | <u>(c/g)gCTCCct</u>                    | 1.000                 | 0.913  | 0.000                | 0.177    |
| SZF1-1                  | 16 (-)   | gccct(c/g)gctCCCTGc                    | 1.000                 | 0.725  | 0.000                | -0.027   |
| C/EBP                   | 13 (+)   | cTTGCCct(c/g)gct                       | 0.995                 | 0.831  | 0.000                | -0.010   |
| Pax-5                   | 11 (-)   | gccttgccct(C/G)GCTCccctgcagccccag      | 0.973                 | 0.599  | 0.262                | 0.110    |
| CACD                    | 20 (+)   | t(c/g)gCTCCC                           | 0.948                 | 0.772  | 0.000                | 0.117    |
| Zic3                    | 20 (-)   | t(c/g)gCTCCct                          | 0.948                 | 0.796  | 0.000                | -0.013   |
| KROX                    | 13 (+)   | ctgCCCT(C/G)gctcc                      | 0.933                 | 0.857  | 0.249                | 0.169    |
| ZF5                     | 15 (+)   | tgccct(C/G)GCTCcc                      | 0.919                 | 0.693  | 0.334                | 0.226    |
| MTF-1                   | 13 (+)   | ctTGCCct(c/g)gctcc                     | 0.900                 | 0.799  | 0.000                | 0.138    |
| SZF1-1                  | 8 (-)    | agggcctgCCCT(C/G)g                     | 0.896                 | 0.696  | -0.104               | -0.059   |
| MOVO-B                  | 17 (-)   | CCCT(C/G)gc                            | 0.883                 | 0.888  | 0.243                | 0.232    |
| TFII-I                  | 18 (-)   | CCT(C/G)Gctcc                          | 0.866                 | 0.909  | 0.081                | 0.055    |
| ZF5                     | 13 (+)   | ctggccCT(C/G)Gctc                      | 0.864                 | 0.772  | 0.111                | 0.076    |
| Spz1                    | 15 (-)   | tgccct(c/g)GCTCCctg                    | 0.828                 | 0.789  | 0.000                | 0.052    |
| MAZ                     | 17 (-)   | ccCT(C/G)Gct                           | 0.819                 | 0.841  | 0.165                | 0.117    |
| Pbx                     | 14 (-)   | ttgccct(C/G)GCTC                       | 0.800                 | 0.817  | 0.223                | 0.140    |
| AhR                     | 16 (-)   | gccCT(C/G)Gctcc                        | 0.800                 | 0.771  | 0.200                | 0.188    |
| GABP                    | 19 (-)   | ct(c/g)gCTCCctgc                       | 0.800                 | 0.771  | 0.000                | 0.099    |
| MAF                     | 17 (-)   | ccct(c/g)gCTCCctgcag                   | 0.800                 | 0.596  | 0.000                | 0.023    |
| MAF                     | 7 (-)    | cagggcCTTGccct(c/g)g                   | 0.800                 | 0.547  | 0.000                | 0.010    |
| Spz1                    | 11 (-)   | gccttgccCT(C/G)Gctc                    | 0.799                 | 0.779  | 0.273                | 0.222    |
| PPARgamma:RXRalpha      | 4 (-)    | ggtcagggcctTGCCct(c/g)gct              | 0.792                 | 0.593  | 0.000                | 0.017    |
| MOVO-B                  | 19 (-)   | CT(C/G)Gctc                            | 0.789                 | 0.795  | 0.261                | 0.249    |
| c-Ets-1                 | 16 (-)   | gccct(c/g)gctCCCTgc                    | 0.773                 | 0.764  | 0.000                | 0.012    |
| Msx-1                   | 21 (+)   | (c/g)gctCCCTg                          | 0.766                 | 0.806  | 0.000                | 0.076    |
| Pax                     | 19 (-)   | ct(c/g)gctCCCTG                        | 0.757                 | 0.579  | 0.000                | -0.030   |
| PPARalpha:RXRalpha      | 8 (-)    | agggCCTTGccct(c/g)gctccc               | 0.751                 | 0.646  | 0.000                | -0.015   |
| CP2/LBP-1c/LSF          | 18 (+)   | CCT(C/G)Gctccctgcag                    | 0.716                 | 0.659  | -0.225               | -0.141   |
| LF-A1                   | 19 (-)   | ct(c/g)GCTCC                           | 0.689                 | 0.599  | 0.000                | -0.181   |
| myogenin / NF-1         | 7 (+)    | cagggccttgccCT(C/G)Gctccctgcagccc      | 0.687                 | 0.576  | -0.213               | -0.074   |
| CACD                    | 18 (+)   | cct(C/G)GCTC                           | 0.667                 | 0.710  | 0.249                | 0.169    |
| NF-1                    | 17 (+)   | ccCT(C/G)Gctccctgcagcc                 | 0.661                 | 0.649  | -0.260               | -0.246   |
| p53                     | 10 (+)   | ggCCTTGccct(c/g)gctccctg               | 0.645                 | 0.519  | 0.000                | -0.063   |
| Pax                     | 13 (+)   | CTTGccct(c/g)gc                        | 0.643                 | 0.638  | 0.000                | 0.029    |
| PPARalpha:RXRalpha      | 21 (-)   | (c/g)gctccctgcaGCCcagc                 | 0.623                 | 0.632  | 0.000                | 0.026    |
| Pax-5                   | 5 (-)    | gtcagggcctTGCCct(c/g)gctccctgcag       | 0.611                 | 0.583  | 0.000                | -0.014   |
| Hand1:E47               | 11 (+)   | gccttgccCT(C/G)Gctcc                   | 0.608                 | 0.558  | -0.260               | -0.220   |
| LXR, PXR, CAR, COUP, RA | 20 (-)   | t(c/g)GCTCCctgcagcccc                  | 0.593                 | 0.641  | 0.000                | -0.036   |
| SMAD                    | 19 (-)   | ct(C/G)GCTCctg                         | 0.511                 | 0.532  | -0.251               | -0.232   |
| Pax-6                   | 14 (+)   | ttgccct(C/G)GCTccc                     | 0.431                 | 0.586  | -0.198               | -0.088   |
| LF-A1                   | 20 (+)   | T(C/G)GCTccc                           | 0.373                 | 0.445  | -0.306               | -0.217   |

**Table S3. Differential Transcription Factor Binding Candidates for rs58920878.** Biobase Match search using Matrix library: TRANSFAC MATRIX TABLE, Release 2013.4, and Profile: vertebrate\_non\_redundant.prf, minimize false negatives. Candidate TF list was determined using the C allele +/- 20 bp. Predicted TFs with a change in core and matrix scores < 0.010 upon search using the G allele were eliminated. Differences in core and matrix scores with the G allele are listed in the right two columns. Proteins predicted to preferentially bind the C allele are highlighted in red; proteins predicted to preferentially bind the G allele are highlighted in green. Darker shades indicate greater differences in core and matrix scores. SNP position is underlined in binding sequence. Position and orientation of motif start site relative to the beginning of the 41mer search sequence are listed in column 2.
